# Supplementary material for: Synthesis and photoluminescence properties of Ce3+ and Eu2+-activated Ca7Mg(SiO4)4 phosphors for solid state lighting
Source: Royal Society of Chemistry journal article supplement (doi:10.1039/c2cp23343f), 2011-12-20
Supplement: c2cp23343f.pdf [file c2cp23343f.pdf]

## **Supporting information**

### **Synthesis and Photoluminescence Properties of Ce<sup>3+</sup> and Eu<sup>2+</sup> -activated**

#### **Ca<sub>7</sub>Mg(SiO<sub>4</sub>)<sub>4</sub> Phosphors for Solid State Lighting**

Yongchao Jia<sup>a,b</sup>, Hui Qiao<sup>a,b</sup>, Yuhua Zheng<sup>a,b</sup>, Ning Guo<sup>a,b</sup>, Hongpeng You<sup>a,\*</sup>

<sup>a</sup>State key Laboratory of Rare Earth Resource Utilization, Changchun Institute of Applied  
Chemistry, Chinese Academy of Sciences, Changchun 130022, P. R. China.

<sup>b</sup>Graduate University of the Chinese Academy of Sciences, Beijing 100049, P. R. China.

\*Corresponding author: E-mail address: [hpyou@ciac.jl.cn](mailto:hpyou@ciac.jl.cn)

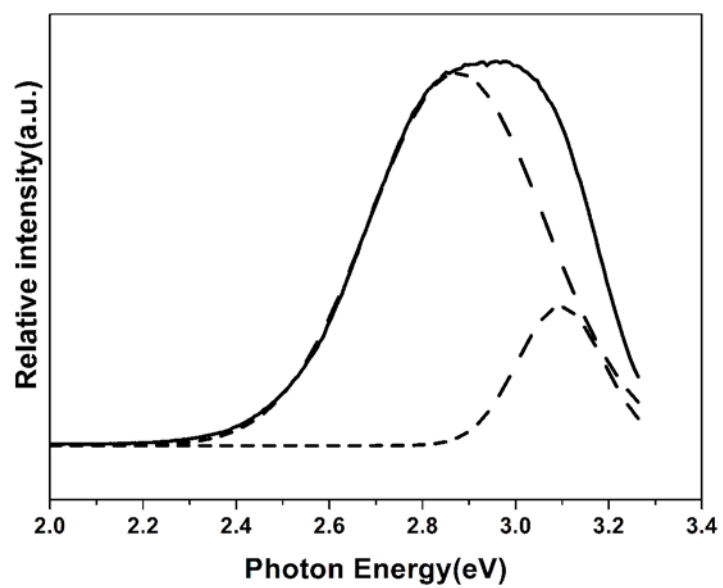

**Figure S1.** Deconvoluted emission spectrum of  $\text{Ca}_7\text{Mg}(\text{SiO}_4)_4:\text{Ce}^{3+}$  as a sum of two Gaussian bands.

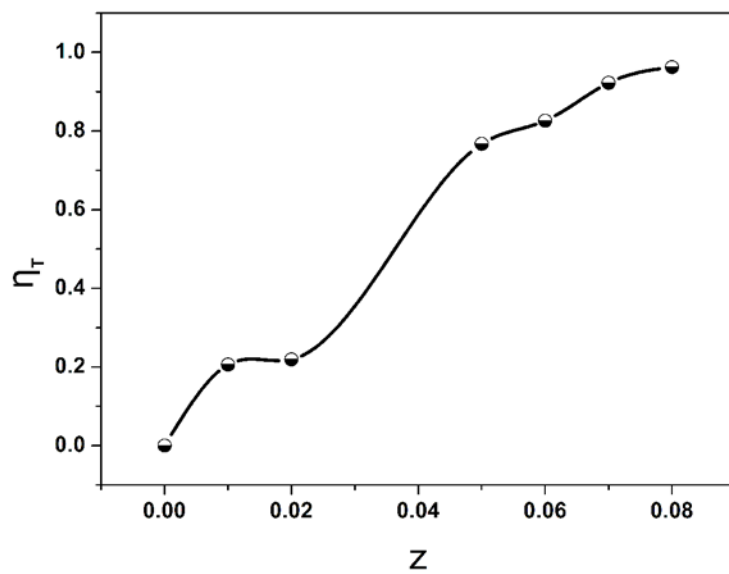

**Figure S2.** Dependence of the energy transfer efficiency  $\eta_T$  on  $\text{Eu}^{2+}$  content ( $z$ ).

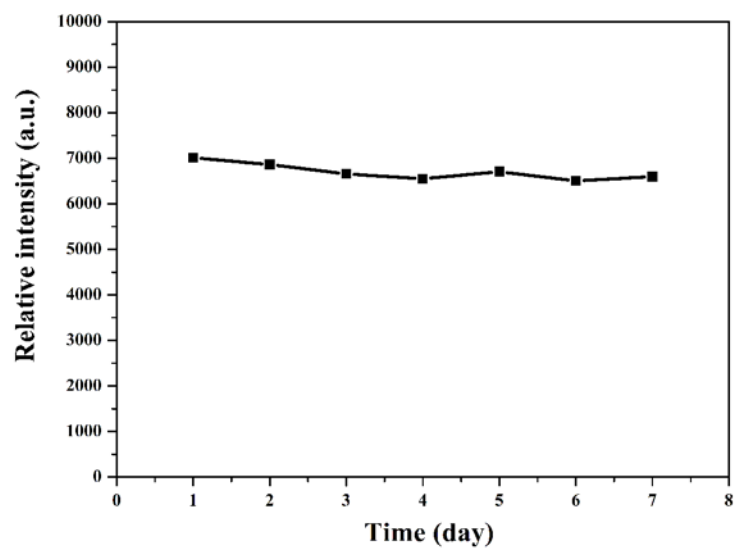

**Figure S3.** Variation of the emission intensity of CMSO: 0.04Eu<sup>2+</sup> phosphor on the time espousing in the air.

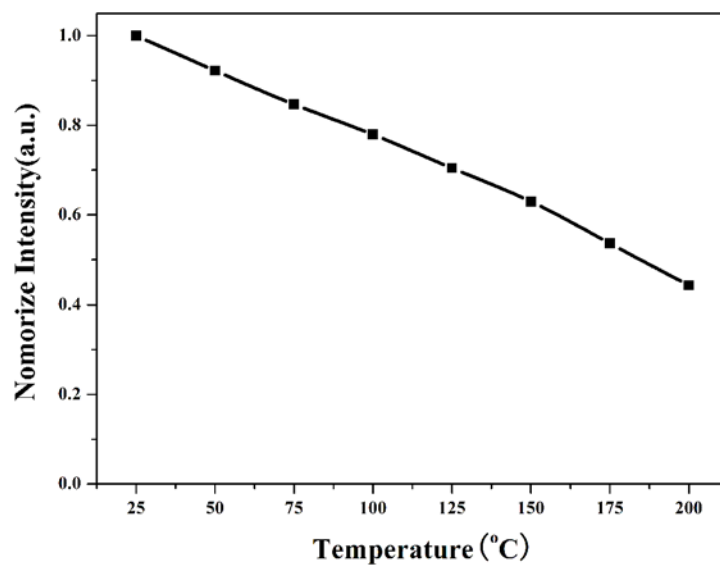

**Figure S4.** Temperature dependence of the emission intensities of CMSO:0.04Eu<sup>2+</sup> phosphor between 25°C and 200°C.
